# Supplementary material
Source: publisher site journal article supplement (https://www.spandidos-publications.com/7374/downloadSupplementary)
Supplement: Supplementary file 1 [file downloadSupplementary]

## Sheet: Up-gray only
Table SII. Differentially expressed metabolites in gray and white matter after spinal cord injury.
Compound ID	Metabolites
HMDB0000024	3-O-Sulfogalactosylceramide (d18:1/24:0)
HMDB0000195	Inosine
HMDB0000272	Phosphoserine
HMDB0000481	Allopurinol riboside
HMDB0000562	Creatinine
HMDB0000641	L-Glutamine
HMDB0001043	FA(20:4)
HMDB0001721	DL-O-Phosphoserine
HMDB0002031	Ureidoisobutyric acid
HMDB0002177	Cis-8,11,14,17-Eicosatetraenoic acid
HMDB0003040	Arabinosylhypoxanthine
HMDB0003423	D-Glutamine
HMDB0006036	Mesterolone
HMDB0006899	Alanylglycine
HMDB0009311	PE(44:3)
HMDB0010163	PS(36:1)
HMDB0012250	L-Aspartyl-4-phosphate
HMDB0031160	1-Pentanesulfenothioic acid
HMDB0033912	2-Propenyl propyl disulfide
HMDB0036702	Sideridiol
HMDB0036721	ent-17-Hydroxy-16beta-kauran-19-al
HMDB0036754	Yucalexin P21
HMDB0036829	Copalic acid
HMDB0037824	7,13-Eperudien-15-oic acid
HMDB0038890	Methyl 3-methyl-1-butenyl disulfide
HMDB0039687	Oryzalexin S
HMDB0039702	Oryzalexin E
HMDB0041392	1-Propenyl propyl disulfide
HMDB0041988	Pinazepam
HMDB0114093	DMPE(42:3)
HMDB0240707	Aminomethylphosphonic acid
HMDB0245166	2-Hydroxypyrazine
HMDB0246116	3(2H)-Pyridazinone
HMDB0246317	4-[(2S)-2-Aminopropyl]-N,3-dimethylaniline
HMDB0246813	5-Hydroxypyrimidine
HMDB0256975	pyrimidin-2-ol
HMDB0256976	pyrimidin-4-ol
HMDB0259216	Triglycerol
HMDB0302325	D-2-Butylisothiocyanate
HMDB0302370	4-(Methylthio)-butanonitrile
HMDB0303135	trans-Propenyl propyl disulfide
HMDB0303880	2-isopentyl-3,6-dimethyl pyrazine

## Sheet: Up-white only
Table SII. Differentially expressed metabolites in gray and white matter after spinal cord injury.
Compound ID	Metabolites
HMDB0000012	Deoxyuridine
HMDB0000190	L-Lactic acid
HMDB0000205	Phenylpyruvic acid
HMDB0000451	cis-4-Hydroxycyclohexylacetic acid
HMDB0000567	Cinnamic acid
HMDB0000593	PC(36:2)
HMDB0000700	Hydroxypropionic acid
HMDB0000909	trans-4-Hydroxycyclohexylacetic acid
HMDB0000930	trans-Cinnamic acid
HMDB0001051	Glyceraldehyde
HMDB0001311	D-Lactic acid
HMDB0001713	m-Coumaric acid
HMDB0001860	Paraxanthine
HMDB0001882	Dihydroxyacetone
HMDB0001889	Theophylline
HMDB0001892	Menadione
HMDB0002035	4-Hydroxycinnamic acid
HMDB0002641	2-Hydroxycinnamic acid
HMDB0002825	Theobromine
HMDB0004400	5-Acetylamino-6-amino-3-methyluracil
HMDB0007879	PC(34:1)
HMDB0007889	PC(36:4)
HMDB0007988	PC(38:4)
HMDB0008908	PE(37:1)
HMDB0008915	PE(39:1)
HMDB0009644	PE(22:6)
HMDB0011169	L-beta-aspartyl-L-threonine
HMDB0011394	PE(40:7)
HMDB0011687	Phenylbutyrylglutamine
HMDB0011737	gamma-Glutamylglutamic acid
HMDB0012225	Enol-phenylpyruvate
HMDB0013126	Butenylcarnitine
HMDB0015023	Pemirolast
HMDB0015163	Irbesartan
HMDB0028752	Aspartyl-Glutamate
HMDB0028755	Aspartyl-Histidine
HMDB0028763	Aspartyl-Threonine
HMDB0028815	Glutamylaspartic acid
HMDB0028881	Histidylaspartic acid
HMDB0029504	Marindinin
HMDB0029688	2-Ethoxynaphthalene
HMDB0030677	cis-p-Coumaric acid
HMDB0031621	Cinnamylideneacetone
HMDB0031781	O-Ethyl S,S-diphenyl phosphorodithioate
HMDB0033514	Fusarochromanone
HMDB0034345	7-Acetoxy-6-methoxycoumarin
HMDB0035076	2-(2-Methylpropoxy)naphthalene
HMDB0036189	Tetrahydrofurfuryl cinnamate
HMDB0036456	10-Hydroxy-3-methoxy-1,3,5,7-cadinatetraen-9-one
HMDB0036605	Pterosin E
HMDB0037460	Tricin 7-diglucuronoside
HMDB0038440	1-Isothiocyanato-7-(methylthio)heptane
HMDB0040012	2,3-Dihydro-5-(5-methyl-2-furanyl)-1H-pyrrolizine
HMDB0040408	7-Hydroxy-2-methyl-4-oxo-4H-1-benzopyran-5-acetic acid
HMDB0040986	p-Coumaraldehyde
HMDB0041856	Chlorpyrifos
HMDB0060354	2-Polyprenyl-6-methoxy-1,4-benzoquinone
HMDB0060388	4-Hydroxy-3-polyprenylbenzoate
HMDB0060683	2-n-Propyl-4-oxopentanoic acid
HMDB0060685	3-Oxovalproic acid
HMDB0062501	N-Acetyl-serylaspartic acid
HMDB0113055	MMPE(38:4)
HMDB0113104	MMPE(40:4)
HMDB0113934	DMPE(37:4)
HMDB0115591	PA(41:3)
HMDB0241416	Tetradeca-5,8,11-trienedioylcarnitine
HMDB0241417	Tetradeca-8,10,12-trienedioylcarnitine
HMDB0241418	Tetradeca-5,7,9-trienedioylcarnitine
HMDB0241419	(2E,4Z,10Z)-Tetradeca-2,4,10-trienedioylcarnitine
HMDB0241420	Tetradeca-7,9,11-trienedioylcarnitine
HMDB0241421	Tetradeca-6,8,10-trienedioylcarnitine
HMDB0241422	Tetradeca-4,7,10-trienedioylcarnitine
HMDB0241423	Tetradeca-6,9,12-trienedioylcarnitine
HMDB0243858	1-Deoxy-1-morpholino-D-fructose
HMDB0244099	Dilinoleoylphosphatidylcholine
HMDB0245639	N-Benzyl-9-(tetrahydro-2H-pyran-2-YL)adenine
HMDB0247132	2-Amino-4-hydroxy-6,7-dimethyl-5,6,7,8-tetrahydropteridine
HMDB0247940	Acifran
HMDB0248606	Armillarisin A
HMDB0250581	Cucurbitacin E
HMDB0252812	Glutamine pyruvate
HMDB0253447	Indanidine
HMDB0253569	Iprofenin
HMDB0253800	Kifunensine
HMDB0257619	Phosphoric acid hydroxymethyl ester
HMDB0257975	(2S)-5-Amino-2-[(2-carboxy-2-oxoethyl)amino]-5-oxopentanoic acid
HMDB0258411	N-Succinimidyl 3-(2-pyridyldithio)propionate
HMDB0259987	zaprinast
HMDB0303534	Potassium carbonate (K2CO3)
HMDB0303537	Potassium hydrogen carbonate

## Sheet: Up-both gray and white
Table SII. Differentially expressed metabolites in gray and white matter after spinal cord injury.
Compound ID	Metabolites
HMDB0000064	Creatine
HMDB0000076	Dihydrouracil
HMDB0000086	Glycerophosphocholine
HMDB0000092	Dimethylglycine
HMDB0000112	gamma-Aminobutyric acid
HMDB0000132	Guanine
HMDB0000157	Hypoxanthine
HMDB0000380	2-Hydroxyestradiol-3-methyl ether
HMDB0000403	2-Hydroxyadenine
HMDB0000405	2-Methoxyestradiol
HMDB0000452	L-alpha-Aminobutyric acid
HMDB0000542	8-Hydroxyadenine
HMDB0000650	D-alpha-Aminobutyric acid
HMDB0000764	Hydrocinnamic acid
HMDB0000897	7-Methylguanine
HMDB0000954	Ferulic acid
HMDB0000982	5-Methylcytidine
HMDB0001257	Spermidine
HMDB0001906	2-Aminoisobutyric acid
HMDB0002166	(S)-beta-Aminoisobutyric acid
HMDB0002222	3-Methylphenylacetic acid
HMDB0002237	3,4-Dimethylbenzoic acid
HMDB0002299	(R)-beta-Aminoisobutyric acid
HMDB0003152	N-Methylnicotinamide
HMDB0003646	N-Methylhydantoin
HMDB0003911	3-Aminoisobutanoic acid
HMDB0003955	19-Hydroxyandrost-4-ene-3,17-dione
HMDB0003959	19-Oxotestosterone
HMDB0004827	Proline betaine
HMDB0006040	N2-Methylguanine
HMDB0006771	7a-Hydroxyandrost-4-ene-3,17-dione
HMDB0006773	11b-Hydroxyandrost-4-ene-3,17-dione
HMDB0006774	16a-Hydroxyandrost-4-ene-3,17-dione
HMDB0009793	PI(38:4)
HMDB0011664	3-Methylene-indolenine
HMDB0011743	2-Phenylpropionate
HMDB0012228	Ethylphosphate
HMDB0012782	4-Methoxy-17beta-estradiol
HMDB0013070	Sinapyl alcohol
HMDB0013222	Beta-Guanidinopropionic acid
HMDB0013897	4-ene-Valproic acid
HMDB0013902	2-ene-Valproic acid
HMDB0013903	(3Z)-2-Propylpent-3-enoic acid
HMDB0013940	3'-Hydroxyhexobarbital
HMDB0013941	Epoxy-hexobarbital
HMDB0013989	O-Desmethylnaproxen
HMDB0014738	Monobenzone
HMDB0028699	Alanyltyrosine
HMDB0029004	Phenylalanylserine
HMDB0029046	Serylphenylalanine
HMDB0029098	Tyrosyl-Alanine
HMDB0029284	Avenanthramide 1c
HMDB0029669	Eremopetasinorone A
HMDB0029758	Herniarin
HMDB0030150	Jasmine ketolactone
HMDB0030197	(Z)-3-Oxo-2-(2-pentenyl)-1-cyclopenteneacetic acid
HMDB0030636	Batatasin III
HMDB0030646	(Z)-3-(1-Butenyl)-1H-2-benzopyran-1-one
HMDB0030647	Artemidinol
HMDB0030681	5-Deoxydiplosporin
HMDB0030731	3-(1,1-Dimethylallyl)herniarin
HMDB0030813	Cassiachromone
HMDB0030816	6-Acetyl-2,2-dimethyl-2H-1-benzopyran
HMDB0031038	(2Z,8S,9Z)-2,9-Heptadecadiene-8-hydroxy-4,6-diyne-1-yl acetate
HMDB0031054	10-Hydroxy-2,8-decadiene-4,6-diynoic acid
HMDB0031082	1-Pentadecene
HMDB0031083	(E)-7-Pentadecene
HMDB0031240	2-Phenyl-1,3-dioxolane-4-methanol
HMDB0031293	2,3-Octanedione
HMDB0031329	Butyl nitrite
HMDB0031343	Methyl cyclohexanecarboxylate
HMDB0031642	N-Nitroso-pyrrolidine
HMDB0031654	3-Aminobutanoic acid
HMDB0031663	3-(3-Methylbutylidene)-1(3H)-isobenzofuranone
HMDB0031864	Methyleugenol
HMDB0031925	5-Hydroxy-2-(5-methyl-1-oxo-4-hexenyl)benzofuran
HMDB0032035	6-(3,4-Methylenedioxyphenyl)-3,5-hexadien-2-one
HMDB0032174	Benzaldehyde glyceryl acetal
HMDB0032176	Benzyl hexanoate
HMDB0032412	Methyl beta-naphthyl ketone
HMDB0032574	Propylparaben
HMDB0032582	2-Biphenylol
HMDB0032641	Batatasin IV
HMDB0032656	(Z)-6-(2-Methoxyvinyl)-7-methyl-2H-1-benzopyran-2-one
HMDB0032660	(2Z,4'Z)-2-(5-Methylthio-4-penten-2-ynylidene)-1,6-dioxaspiro[4.4]non-3-ene
HMDB0032708	1-Naphthaleneacetic acid
HMDB0032861	2-Methoxynaphthalene
HMDB0032883	1,4,5-Naphthalenetriol
HMDB0032990	7-Hydroxy-6-methyl-2H-1-benzopyran-2-one
HMDB0032991	7-Methoxy-6-methyl-2H-1-benzopyran-2-one
HMDB0033125	[8]-Dehydroshogaol
HMDB0033178	5-Methylquinoxaline
HMDB0033245	6-(Hydroxymethyl)-2,4(1H,3H)-pteridinedione
HMDB0033330	Dihydrocoriandrin
HMDB0033813	3-(3,4-Methylenedioxyphenyl)propenal
HMDB0033952	Gyromitrin
HMDB0034028	2-(3,7-Dimethyl-2,6-octadienyl)-4-hydroxy-6-methoxyacetophenone
HMDB0034167	Falcarindiol 3-acetate
HMDB0034175	2-Aminoquinoline
HMDB0034446	Diphenyl ether
HMDB0034469	2-Phenylpropyl butyrate
HMDB0034723	Encelin
HMDB0035013	2-Phenylethyl propanoate
HMDB0035016	2-Phenylethyl pentanoate
HMDB0035017	2-Phenylethyl 3-methylbutanoate
HMDB0036240	Methyl 4-tert-butylphenylacetate
HMDB0036385	Methyl 4-phenylbutanoate
HMDB0036391	alpha-Methylphenethyl butyrate
HMDB0036460	Safynol
HMDB0036696	Yucalexin B'11
HMDB0037194	Ethyl-2-ethyl-3-phenylpropanoate
HMDB0037604	10beta-12,13-Dinor-8-oxo-6-eremophilen-11-al
HMDB0037720	2-Phenylethyl 2-methylbutanoate
HMDB0037723	2-Phenylethyl 2-furancarboxylate
HMDB0037733	Propyl 2-furanacrylate
HMDB0038017	Ethyl 2-phenyl-3-furancarboxylate
HMDB0038179	3-(2-Hydroxy-4-methylphenyl)-2-butanone
HMDB0038548	Glandulone B
HMDB0038577	(Z)-N-Coumaroyl-5-hydroxyanthranilic acid
HMDB0038911	(2S,3S,4S)-5,7,9,11-Tridecatetrayne-1,2,3,4-tetrol
HMDB0038974	3,3-Dimethyl-1,2-dithiolane
HMDB0039359	Methyl (Z,Z)-10-hydroxy-2,8-decadiene-4,6-diynoate
HMDB0039568	Ginsenoyne H
HMDB0039789	Tetrahydro-2-methyl-2-thiophenethiol
HMDB0039790	Tetrahydro-2-methyl-3-thiophenethiol
HMDB0040215	cis-3-Hexenyl acetate
HMDB0040326	7-Hydroxy-2,5-dimethyl-4H-1-benzopyran-4-one
HMDB0040358	(R)-Bitalin A
HMDB0040411	Ethyl 3-phenylpropanoate
HMDB0040431	Hexyl benzoate
HMDB0040731	Avenalumic acid
HMDB0040927	2-Hexyl-5-[2-(4-hydroxy-3-methoxyphenyl)ethyl]furan
HMDB0040938	Coixinden A
HMDB0041122	(S)-2,3-Dihydro-5-hydroxy-2-methyl-1,4-naphthoquinone
HMDB0041141	Marshdine
HMDB0041204	Acetylpanaxydol
HMDB0041325	Salfredin B11
HMDB0041516	Avenanthramide G
HMDB0041945	N-Ethylglycine
HMDB0059622	4-Methylumbelliferone
HMDB0060303	(2-Naphthyl)methanol
HMDB0060322	1-Hydroxymethylnaphthalene
HMDB0062773	10-hydroxy-(2E,8E)-decadien-4-ynoic Acid
HMDB0240294	2-O-Methylascorbic acid
HMDB0240711	Bisphenol F
HMDB0242733	4-Androsten-4-ol-3,17-dione
HMDB0243551	Bioallethrin
HMDB0243757	[1,1'-Biphenyl]-2,3'-diol
HMDB0243958	1-Naphthyl acetate
HMDB0244027	1,1-Dimethylurea
HMDB0244259	1,N6-Ethenoadenine
HMDB0244360	(8R,9R,10S,11S,13R,14R)-11-Hydroxy-10,13-dimethyl-2,6,7,8,9,11,12,14,15,16-decahydro-1H-cyclopenta[a]phenanthrene-3,17-dione
HMDB0244364	11-Ketotestosterone
HMDB0244601	2-(Sec-butyldisulfanyl)-1h-imidazole
HMDB0244855	2-Nitrophenyl a-D-galactopyranoside
HMDB0244965	2-[Hydroxy(phenyl)methyl]phenol
HMDB0244984	2-Amino-3-methyl-1-butanol
HMDB0245198	2-Methoxy-17alpha-estradiol
HMDB0245250	2-Naphthyl acetate
HMDB0245357	2,2'-Methylenediphenol
HMDB0245477	2,4,5-Triphenylimidazole
HMDB0245676	1-(4-Methoxy-1-naphthyl)ethanone
HMDB0245678	4-Nitrophenyl beta-D-glucopyranoside
HMDB0245967	(3-Phenoxyphenyl)methanol
HMDB0246470	(8R,9S,10R,13S,14S)-4-Hydroxy-10,13-dimethyl-1,6,7,8,9,10,11,12,13,14,15,16-dodecahydro-2H-cyclopenta[a]phenanthrene-3,17-dione
HMDB0246489	4-Methoxy-1-naphthaldehyde
HMDB0246490	4-Methoxy-17alpha-estradiol
HMDB0246987	2-Naphthylacetic acid
HMDB0247079	6-Hydroxymethylpterin
HMDB0247086	6-Methoxy-2-naphthaldehyde
HMDB0247248	7-Ethoxycoumarin
HMDB0247266	7-Keto-dehydroepiandrosterone
HMDB0247396	1-(2-Methylbenzo[d]oxazol-6-yl)-3-(1,5-naphthyridin-4-yl)urea
HMDB0247512	7-Methyl-6,8-bis(methylthio)pyrrolo(1,2-a)pyrazine
HMDB0248301	Amiflamina
HMDB0249075	Benzyl phenyl ether
HMDB0249257	Bis(ethylphenyl)ether
HMDB0250015	(S,E)-2-(5-Hydroxy-8,9-dihydro-5H-benzo[7]annulen-6(7H)-ylidene)acetic acid
HMDB0250959	Dehydrotremetone
HMDB0251855	EPIMESTROL
HMDB0251931	Erythrocentaurin
HMDB0252088	Ethylurea
HMDB0252283	Hydroxypropylcellulose
HMDB0252307	Flobufen
HMDB0253863	L-alaninamide
HMDB0255287	N(6),O(2)-Dimethyladenosine
HMDB0255293	N2-Ethyl-2'-deoxyguanosine
HMDB0255452	Naphthoxylactic acid
HMDB0256496	Phosphovanillin
HMDB0256835	Propranolol glycol
HMDB0257286	Rocepafant
HMDB0257882	(8R,9S,13S,14S,17S)-13-Methyl-3-methylperoxy-6,7,8,9,11,12,14,15,16,17-decahydrocyclopenta[a]phenanthren-17-ol
HMDB0258073	(8S,9R,10R,13S,14S)-11-Hydroxy-10,13-dimethyl-5,6,7,8,9,11,12,14,15,16-decahydro-4H-cyclopenta[a]phenanthrene-3,17-dione
HMDB0258855	Testololactone
HMDB0258965	theophylline one
HMDB0259119	Tremetone
HMDB0259120	Trenbolone acetate
HMDB0260174	(8R,9S,10R,13S,14S,17S)-17-Hydroxy-10,13-dimethyl-6,7,8,9,11,12,14,15,16,17-decahydro-1H-cyclopenta[a]phenanthrene-2,3-dione
HMDB0301834	Eutypine
HMDB0302506	4-Deoxy-2,3-dihydromycosinol
HMDB0303033	8-Methoxycoumarin
HMDB0303539	Potassium acetate
HMDB0303720	Sodium benzoate
HMDB0303824	(7E)-4-Deoxy-2,3-dihydromycosinol
HMDB0304825	Sodium lactate

## Sheet: Down-gray only
Table SII. Differentially expressed metabolites in gray and white matter after spinal cord injury.
Compound ID	Metabolites
HMDB0007960	PC(39:1)
HMDB0009014	PE(42:1)
HMDB0033805	Azaspiracid
HMDB0034520	Gypsogenin 3-O-b-D-glucuronide
HMDB0037827	Monoglucuronylglycyrrhetinic acid
HMDB0059647	Adenosine 5'-pentaphosphate
HMDB0250399	Cogoxin
HMDB0251189	Dichloromethylene
HMDB0252731	Gitoxin
HMDB0254710	midecamycin
HMDB0255523	Neoisomidecamycin
HMDB0260702	PE(14:1(9Z)/6 keto-PGF1alpha)
HMDB0260703	PE(6 keto-PGF1alpha/14:1(9Z))
HMDB0260712	PE(14:1(9Z)/TXB2)
HMDB0260713	PE(TXB2/14:1(9Z))
HMDB0260718	PE(14:1(9Z)/5-iso PGF2VI)
HMDB0260719	PE(5-iso PGF2VI/14:1(9Z))
HMDB0274423	PGP(a-15:0/18:1(12Z)-2OH(9,10))
HMDB0274424	PGP(18:1(12Z)-2OH(9,10)/a-15:0)
HMDB0275151	PGP(i-15:0/18:1(12Z)-2OH(9,10))
HMDB0275152	PGP(18:1(12Z)-2OH(9,10)/i-15:0)
HMDB0281766	PS(18:3(6Z,9Z,12Z)/PGJ2)
HMDB0281767	PS(PGJ2/18:3(6Z,9Z,12Z))
HMDB0281870	PS(18:3(9Z,12Z,15Z)/PGJ2)
HMDB0281871	PS(PGJ2/18:3(9Z,12Z,15Z))
HMDB0281977	PS(18:4(6Z,9Z,12Z,15Z)/20:4(6Z,8E,10E,14Z)-2OH(5S,12R))
HMDB0281978	PS(20:4(6Z,8E,10E,14Z)-2OH(5S,12R)/18:4(6Z,9Z,12Z,15Z))
HMDB0282013	PS(18:4(6Z,9Z,12Z,15Z)/20:4(6E,8Z,11Z,13E)-2OH(5S,15S))
HMDB0282014	PS(20:4(6E,8Z,11Z,13E)-2OH(5S,15S)/18:4(6Z,9Z,12Z,15Z))
HMDB0282015	PS(18:4(6Z,9Z,12Z,15Z)/20:4(8Z,11Z,14Z,17Z)-2OH(5S,6R))
HMDB0282016	PS(20:4(8Z,11Z,14Z,17Z)-2OH(5S,6R)/18:4(6Z,9Z,12Z,15Z))

## Sheet: Down-white only
Table SII. Differentially expressed metabolites in gray and white matter after spinal cord injury.
Compound ID	Metabolites
HMDB0030172	Oxyacanthine
HMDB0031598	2,3-Pentanedione
HMDB0031648	2,4-Pentanedione
HMDB0033242	Glycylserylprolylmethionylphenylalanylvalinamide
HMDB0240774	L-Palmitoylcarnitine
HMDB0240783	O-Palmitoylcarnitine
HMDB0240843	12-Methylpentadecanoylcarnitine
HMDB0240844	9-Methylpentadecanoylcarnitine
HMDB0240845	5-Methylpentadecanoylcarnitine
HMDB0240846	6-Methylpentadecanoylcarnitine
HMDB0240847	11-Methylpentadecanoylcarnitine
HMDB0240848	3-Methylpentadecanoylcarnitine
HMDB0240849	8-Methylpentadecanoylcarnitine
HMDB0240850	7-Methylpentadecanoylcarnitine
HMDB0240851	13-Methylpentadecanoylcarnitine
HMDB0240852	4-Methylpentadecanoylcarnitine
HMDB0240853	14-Methylpentadecanoylcarnitine
HMDB0241914	10-Methylpentadecanoylcarnitine
HMDB0242612	Fangchinoline
HMDB0242669	(2S,3S,4R,5R)-5-(6-Aminopurin-9-yl)-N-cyclopropyl-3,4-dihydroxyoxolane-2-carboxamide
HMDB0242681	BERBAMINE
HMDB0244982	beta-Hydroxy-gamma-trimethylaminobutyric acid
HMDB0252925	L-Methioninamide, N-(5-amino-1-oxopentyl)-L-phenylalanyl-L-phenylalanyl-L-prolyl-N-methyl-L-leucyl-
HMDB0253424	Imidazotetrazine
HMDB0254990	N-(2-Hydroxyethyl)valine
HMDB0255782	(2S,3S,4S,5S)-2-(5-Amino-7-methyl-2,6,7,9,11-pentazatricyclo[6.3.1.04,12]dodeca-1(12),3,5,8,10-pentaen-2-yl)-5-(hydroxymethyl)oxolane-3,4-diol
HMDB0258927	Tetrapeptide
HMDB0262711	PA(10:0/22:6(5Z,8E,10Z,13Z,15E,19Z)-2OH(7S, 17S))
HMDB0262712	PA(22:6(5Z,8E,10Z,13Z,15E,19Z)-2OH(7S, 17S)/10:0)
HMDB0262727	PA(10:0/22:6(4Z,7Z,11E,13Z,15E,19Z)-2OH(10S,17))
HMDB0262728	PA(22:6(4Z,7Z,11E,13Z,15E,19Z)-2OH(10S,17)/10:0)
HMDB0266583	PA(8:0/20:3(5Z,8Z,11Z)-O(14R,15S))
HMDB0266584	PA(20:3(5Z,8Z,11Z)-O(14R,15S)/8:0)
HMDB0266585	PA(8:0/20:3(5Z,8Z,14Z)-O(11S,12R))
HMDB0266586	PA(20:3(5Z,8Z,14Z)-O(11S,12R)/8:0)
HMDB0266587	PA(8:0/20:3(5Z,11Z,14Z)-O(8,9))
HMDB0266588	PA(20:3(5Z,11Z,14Z)-O(8,9)/8:0)
HMDB0266589	PA(8:0/20:3(8Z,11Z,14Z)-O(5,6))
HMDB0266590	PA(20:3(8Z,11Z,14Z)-O(5,6)/8:0)
HMDB0266591	PA(8:0/20:4(5Z,8Z,11Z,14Z)-OH(20))
HMDB0266592	PA(20:4(5Z,8Z,11Z,14Z)-OH(20)/8:0)
HMDB0266593	PA(8:0/20:4(6E,8Z,11Z,14Z)-OH(5S))
HMDB0266594	PA(20:4(6E,8Z,11Z,14Z)-OH(5S)/8:0)
HMDB0266595	PA(8:0/20:4(5Z,8Z,11Z,14Z)-OH(19S))
HMDB0266596	PA(20:4(5Z,8Z,11Z,14Z)-OH(19S)/8:0)
HMDB0266597	PA(8:0/20:4(5Z,8Z,11Z,14Z)-OH(18R))
HMDB0266598	PA(20:4(5Z,8Z,11Z,14Z)-OH(18R)/8:0)
HMDB0266599	PA(8:0/20:4(5Z,8Z,11Z,14Z)-OH(17))
HMDB0266600	PA(20:4(5Z,8Z,11Z,14Z)-OH(17)/8:0)
HMDB0266601	PA(8:0/20:4(5Z,8Z,11Z,14Z)-OH(16R))
HMDB0266602	PA(20:4(5Z,8Z,11Z,14Z)-OH(16R)/8:0)
HMDB0266603	PA(8:0/20:4(5Z,8Z,11Z,13E)-OH(15S))
HMDB0266604	PA(20:4(5Z,8Z,11Z,13E)-OH(15S)/8:0)
HMDB0266605	PA(8:0/20:4(5Z,8Z,10E,14Z)-OH(12S))
HMDB0266606	PA(20:4(5Z,8Z,10E,14Z)-OH(12S)/8:0)
HMDB0266607	PA(8:0/20:4(5E,8Z,12Z,14Z)-OH(11R))
HMDB0266608	PA(20:4(5E,8Z,12Z,14Z)-OH(11R)/8:0)
HMDB0266609	PA(8:0/20:4(5Z,7E,11Z,14Z)-OH(9))
HMDB0266610	PA(20:4(5Z,7E,11Z,14Z)-OH(9)/8:0)
HMDB0271083	PG(i-12:0/LTE4)
HMDB0271084	PG(LTE4/i-12:0)
HMDB0290109	Cer(d20:1/PGE2)
HMDB0290110	Cer(d20:1/PGD2)
HMDB0290117	Cer(d20:1/20:4(7E,9E,11Z,13E)-3OH(5S,6R,15S))
HMDB0290224	CE(20:4(6E,8Z,11Z,14Z)+=O(5))
HMDB0290225	CE(20:4(5Z,8Z,11Z,13E)+=O(15))
HMDB0290231	CE(20:5(5Z,8Z,11Z,14Z,16E)-OH(18R))
HMDB0290232	CE(20:5(5Z,8Z,11Z,14Z,16E)-OH(18))
HMDB0290233	CE(20:5(5Z,8Z,10E,14Z,17Z)-OH(12))
HMDB0290234	CE(20:5(6E,8Z,11Z,14Z,17Z)-OH(5))

## Sheet: Down-both gray and white
Table SII. Differentially expressed metabolites in gray and white matter after spinal cord injury.
Compound ID	Metabolites
HMDB0000070	Pipecolic acid
HMDB0000251	Taurine
HMDB0000716	L-Pipecolic acid
HMDB0004094	Indoxyl
HMDB0005960	D-Pipecolic acid
HMDB0029444	2-Pyrrolidineacetic acid
HMDB0029757	4-Hydroxybenzeneacetonitrile
HMDB0029772	Corchoionol C 9-glucoside
HMDB0030370	Citroside A
HMDB0031935	Blumenol C O-[rhamnosyl-(1->6)-glucoside]
HMDB0032390	2-Methyl-4,5-benzoxazole
HMDB0033404	Quillaic acid 3-[galactosyl-(1->2)-glucuronide]
HMDB0035212	Sonchuionoside C
HMDB0036943	Oleragenoside
HMDB0039448	Licoricesaponin J2
HMDB0039512	Periandrin III
HMDB0060494	N-Acetylmuramoyl-Ala
HMDB0060732	25-O-Desacetyl rifabutin
HMDB0249158	Betamethasone 17-benzoate
HMDB0253951	Lactose-lysine
HMDB0255070	N-acetylmuramoyl-L-alanine
HMDB0255071	n-acetylmuramyl-l-alanine
HMDB0266663	PA(8:0/22:6(5Z,7Z,10Z,13Z,16Z,19Z)-OH(4))
HMDB0266664	PA(22:6(5Z,7Z,10Z,13Z,16Z,19Z)-OH(4)/8:0)
HMDB0266665	PA(8:0/22:6(4Z,8Z,10Z,13Z,16Z,19Z)-OH(7))
HMDB0266666	PA(22:6(4Z,8Z,10Z,13Z,16Z,19Z)-OH(7)/8:0)
HMDB0266667	PA(8:0/22:6(4Z,7Z,10Z,12E,16Z,19Z)-OH(14))
HMDB0266668	PA(22:6(4Z,7Z,10Z,12E,16Z,19Z)-OH(14)/8:0)
HMDB0266669	PA(8:0/22:6(4Z,7Z,10Z,13E,15E,19Z)-OH(17))
HMDB0266670	PA(22:6(4Z,7Z,10Z,13E,15E,19Z)-OH(17)/8:0)
HMDB0266673	PA(8:0/22:5(4Z,7Z,10Z,13Z,19Z)-O(16,17))
HMDB0266674	PA(22:5(4Z,7Z,10Z,13Z,19Z)-O(16,17)/8:0)
